# Supplementary material
Source: PubMed Central journal article supplement (PMC8567724)
Supplement: NIHMS1746994-supplement-Supporting_Docs.pdf [file NIHMS1746994-supplement-Supporting_Docs.pdf]

[Supporting Materials]

**Near-infrared Light Triggered *in situ* Cu(DDC)<sub>2</sub> Complex Formation and Reactive Oxygen Species Amplification Cascade for Cancer Therapy**

Xuejia Kang<sup>1</sup>, Yuxin Cai<sup>2</sup>, Qi Wang<sup>1</sup>, Chuanyu Wang<sup>2</sup>, Wu Chen<sup>1</sup>, Wen Yang<sup>2</sup>,

Amol Suryawanshi<sup>3</sup>, Gang Zhou<sup>4</sup>, Pengyu Chen<sup>2</sup>, Feng Li<sup>1,\*</sup>

1. Department of Drug Discovery and Development, Harrison School of Pharmacy, Auburn University, Auburn, AL, 36849 USA
2. Materials Research and Education Center, Materials Engineering, Department of Mechanical Engineering, Auburn University, Auburn, AL, 36849 USA
3. Department of Pathobiology, College of Veterinary Medicine, Auburn University, Auburn, AL, 36849 USA
4. Georgia Cancer Center, Medical College of Georgia, Augusta University, Augusta, GA, USA.

**\* Corresponding author:**

**Feng Li, PhD**

720 South Donahue Drive, Auburn, AL, 36849, USA

Tel:334-844-7406

Email:[FZL0023@auburn.edu](mailto:FZL0023@auburn.edu)

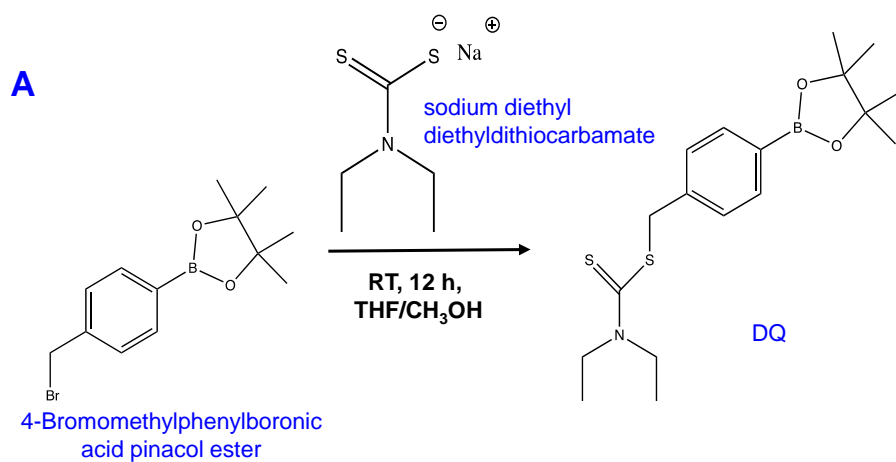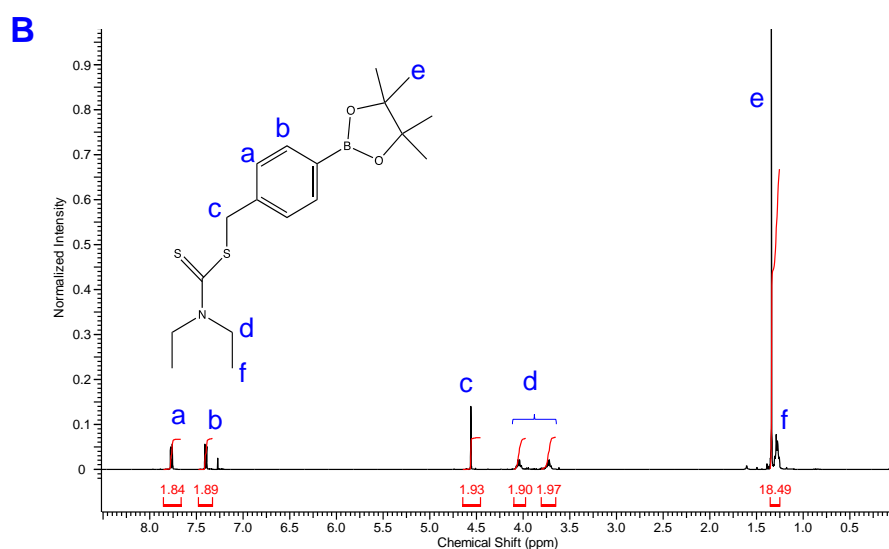

**Scheme S1. (A) Synthesis of DQ.** 4-Bromomethylphenylboronic acid pinacol ester dissolved in THF was added into sodium diethyl diethyldithiocarbamate trihydrate dissolved in CH<sub>3</sub>OH, and reacted at room temperature (RT) for 12 hours. The reaction mixture was dissolved in ethyl acetate, washed with water and brine, concentrated, and purified with a silica column. **(B)** <sup>1</sup>H-NMR spectrum of DQ in CDCl<sub>3</sub>.

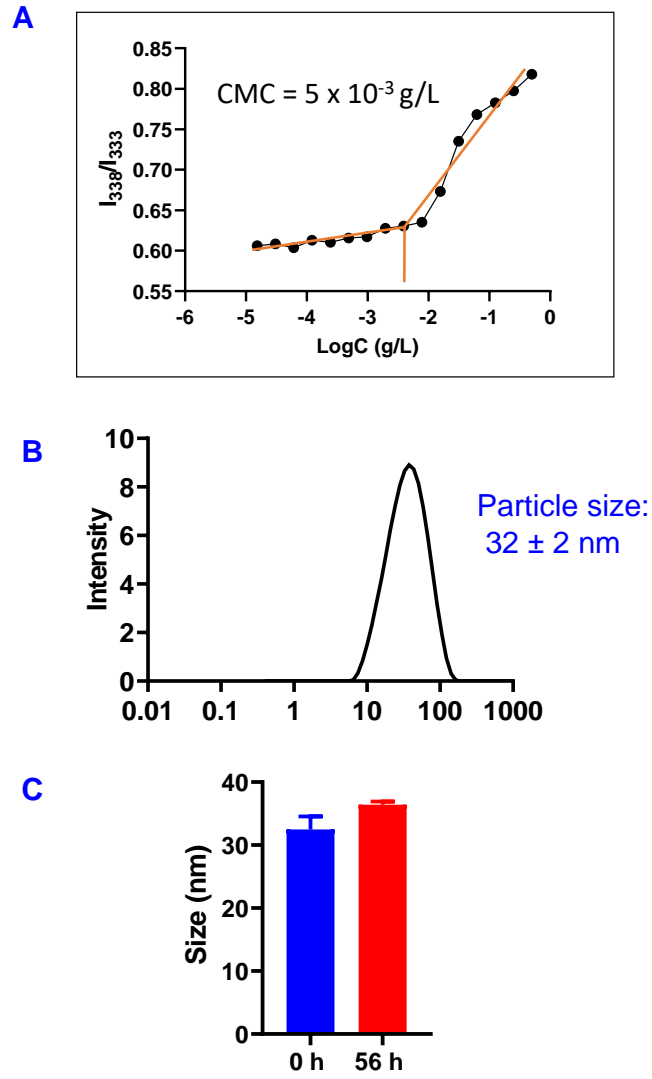

**Figure S2. (A)** Critical Micelle Concentration (CMC) of PEG-PLA micelle. **(B)** Particle size. **(C)** Stability in serum-containing PBS.

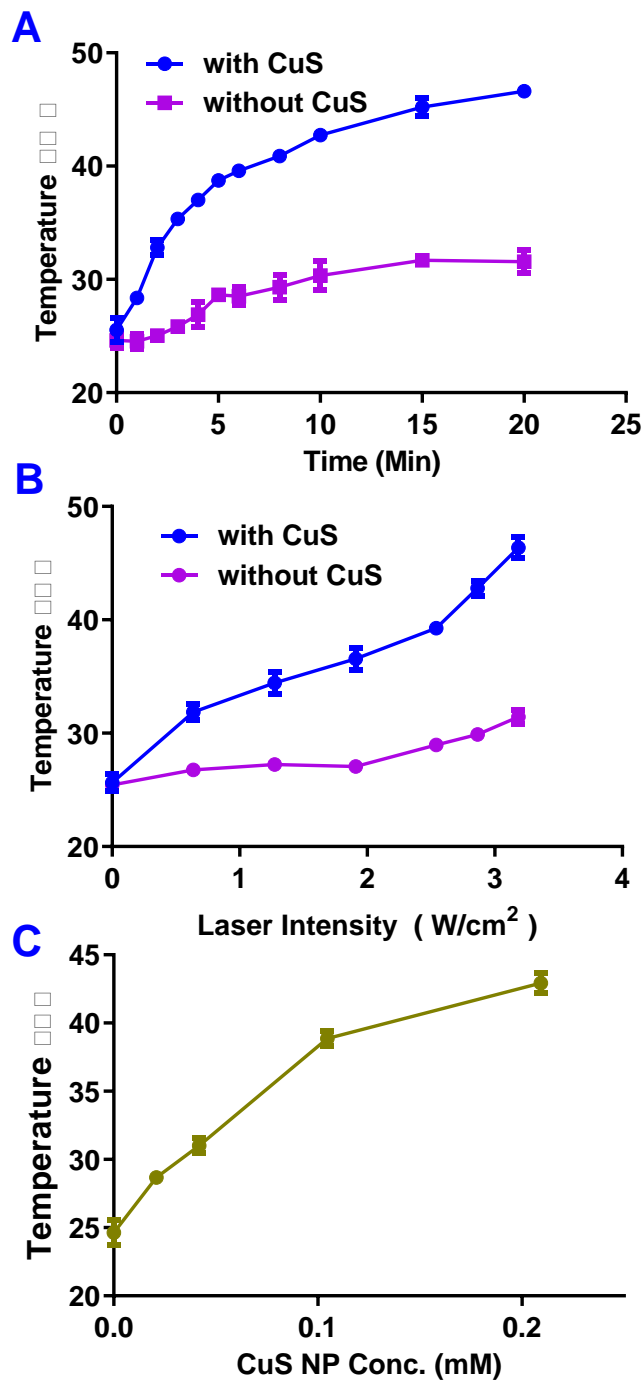

**Figure S3.** Photothermal study of CuS NPs. (A) The effects of NIR laser treatment time on the temperature change in CuS NP sample and pure water control. (NIR laser intensity: 2.54 W/cm<sup>2</sup>, CuS NP concentration: 0.1 mM.) (B) The effects of NIR laser intensity on the temperature change in CuS NP sample and pure water control. (NIR laser treatment time: 5 min. CuS NP concentration: 0.1 mM.) (C) The effect of CuS NP concentration on the temperature change. (NIR laser intensity: 2.54 W/cm<sup>2</sup>; NIR laser treatment time: 5 min.) Results are mean  $\pm$  SD (n=3).

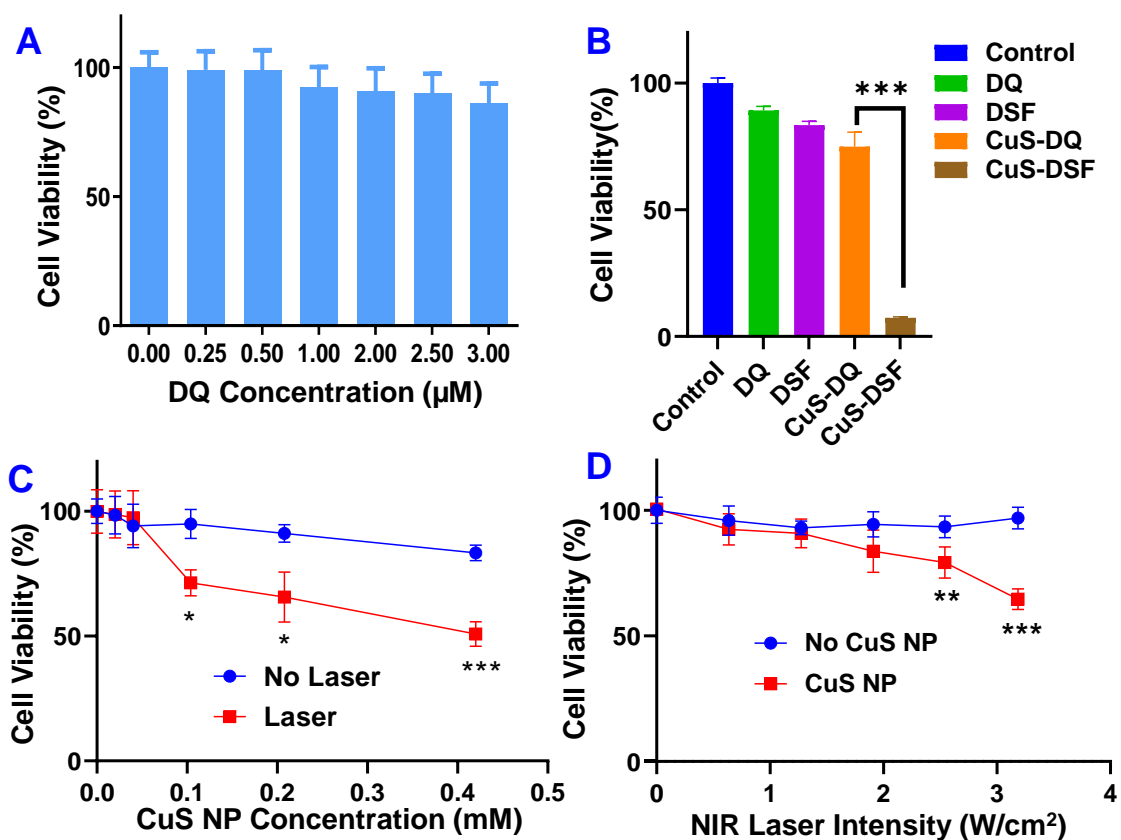

**Figure S4.** (A) The effects of DQ micelles on 4T1 cell viability as determined with the MTT assay. (B) The effects of DQ (2  $\mu\text{M}$ ), DSF (1  $\mu\text{M}$ ), DQ (2  $\mu\text{M}$ ) + CuS (0.1mM), and DSF (1  $\mu\text{M}$ ) + CuS (0.1mM) on 4T1 cell viability as determined with the MTT assay. Effects of (C) CuS NP concentration and (D) NIR laser intensity on 4T1 cells viability as determined with the MTT assay. (Results are mean  $\pm$  SD,  $n=3$ , \*  $P < 0.05$ , \*\*  $P < 0.01$ , \*\*\*  $P < 0.001$ )

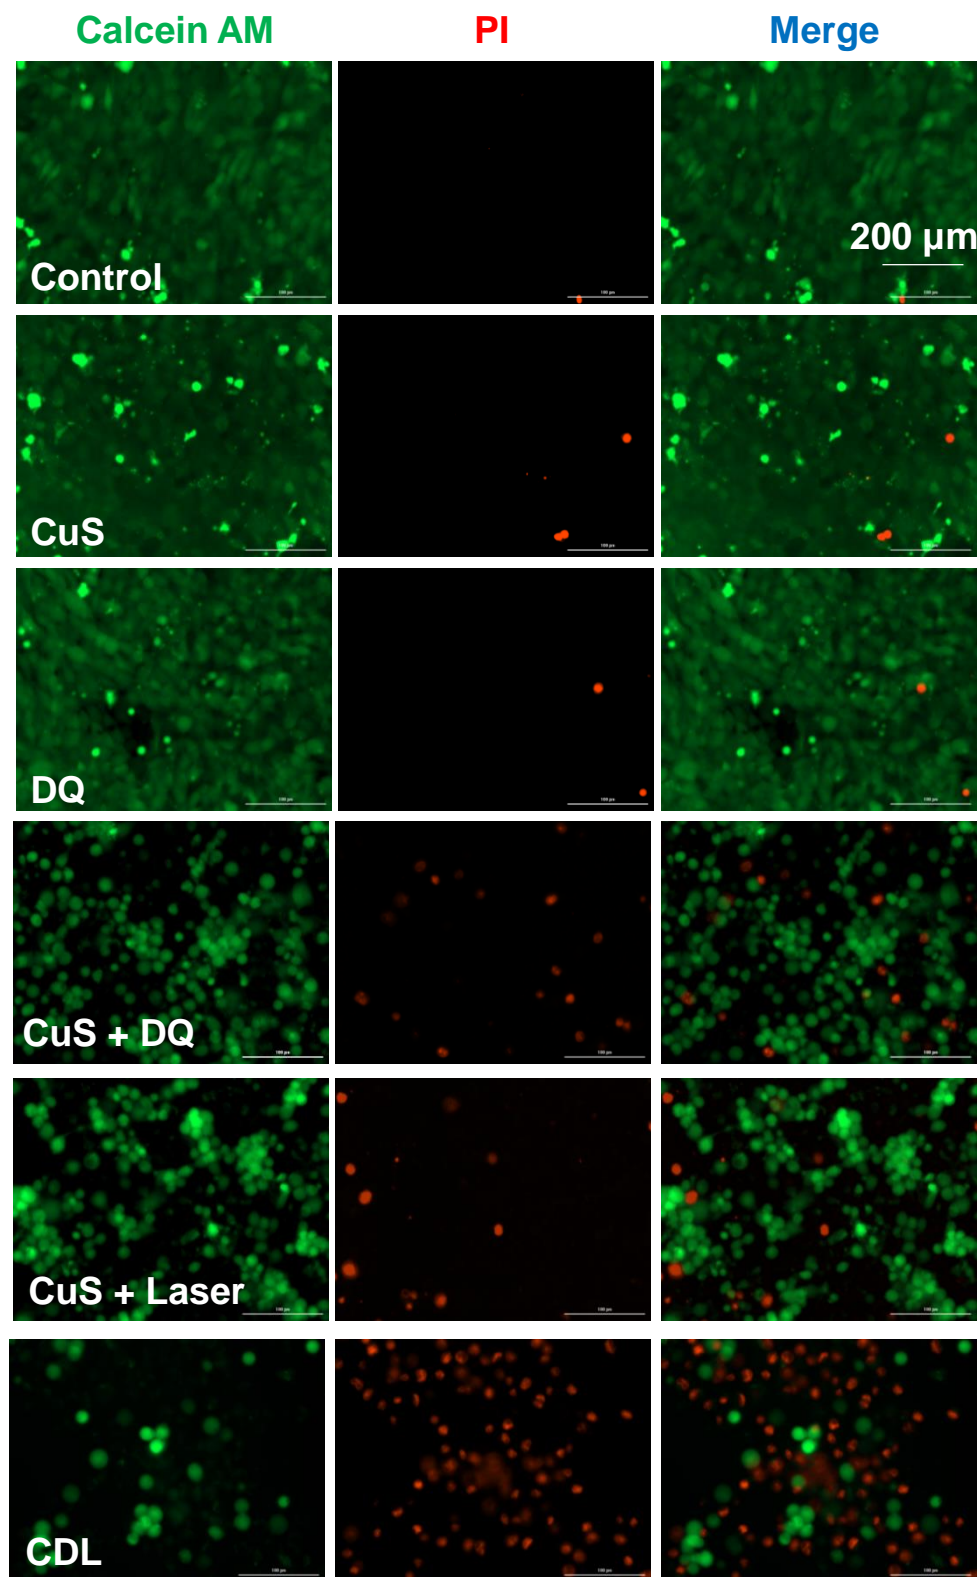

**Figure S5.** The viability of 4T1 cells receiving different treatments were determined with the Calcein-AM/PI staining. (CuS, 0.1 mM; DQ, 2  $\mu$ M; Laser, 2.54 W/cm<sup>2</sup> for 5 minutes.)

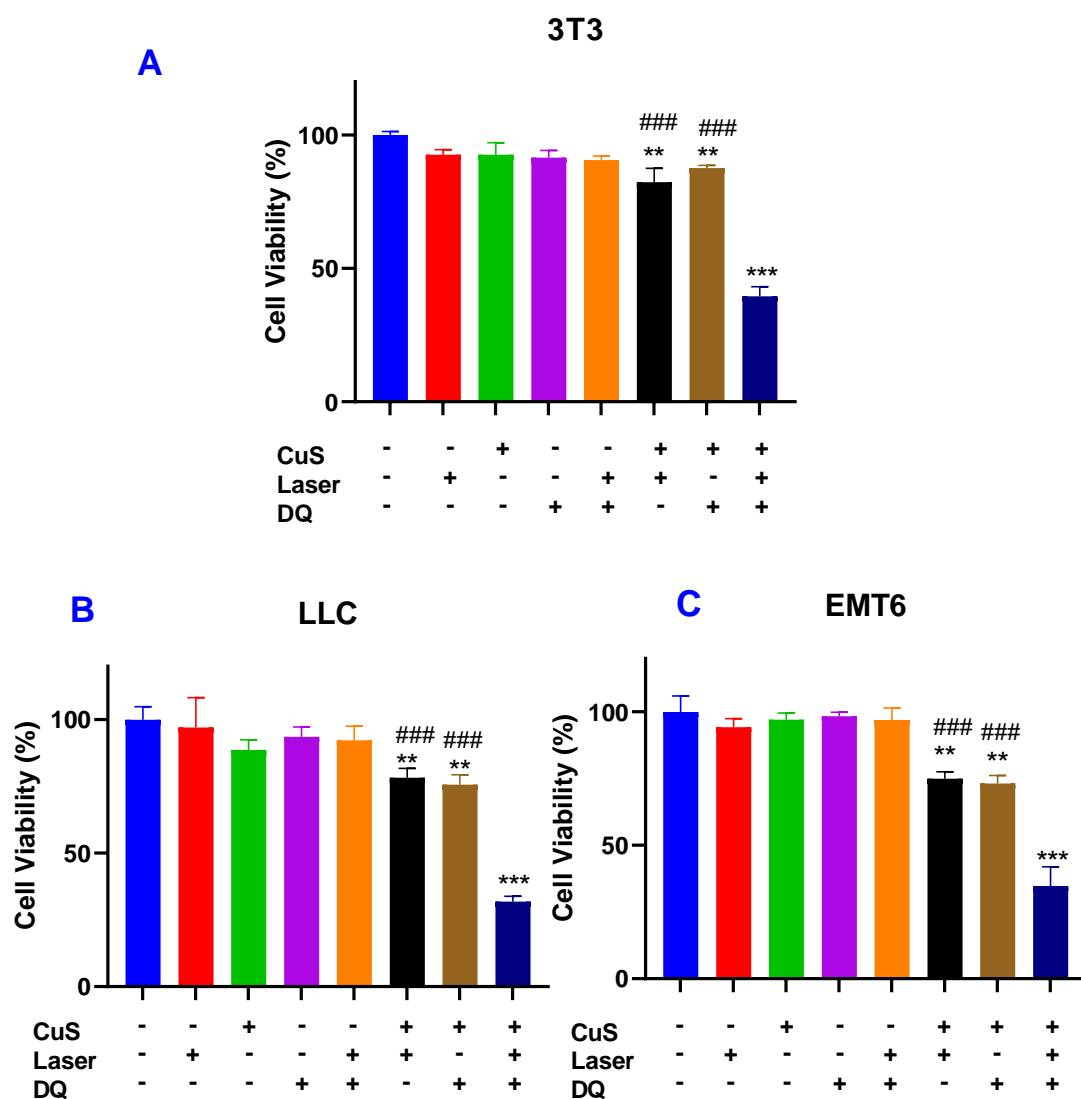

**Figure S6.** The viability of cells was determined with the MTT assay. **(A)** 3T3 cells. **(B)** LLC cell. **(C)** EMT6 cells. (CuS, 0.1mM; DQ, 2  $\mu$ M; Laser, 2.54 W/cm<sup>2</sup> for 5 minutes. Data are presented as the mean  $\pm$  SD, n = 3, \* P < 0.05, \*\* P < 0.01, \*\*\* P < 0.001 compared with the negative control group; ## P < 0.01, ### P < 0.001, compared with CDL treatment group).

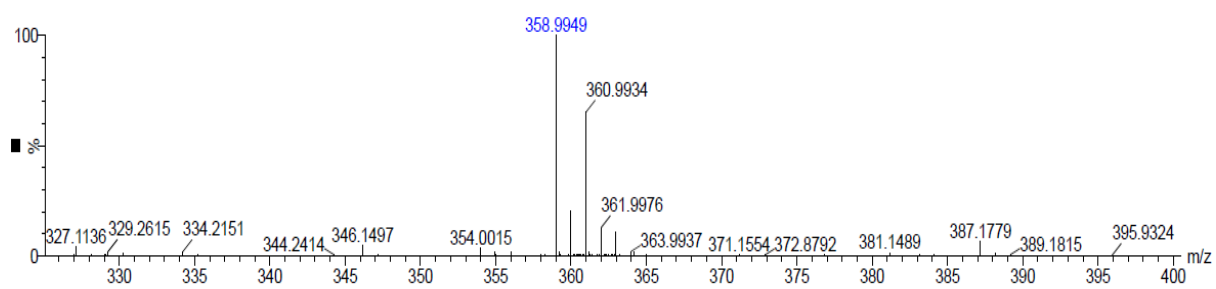

**Figure S7.**  $\text{Cu}(\text{DDC})_2$  formed in cells treated with CDL combination therapy was detected by LC/MS.



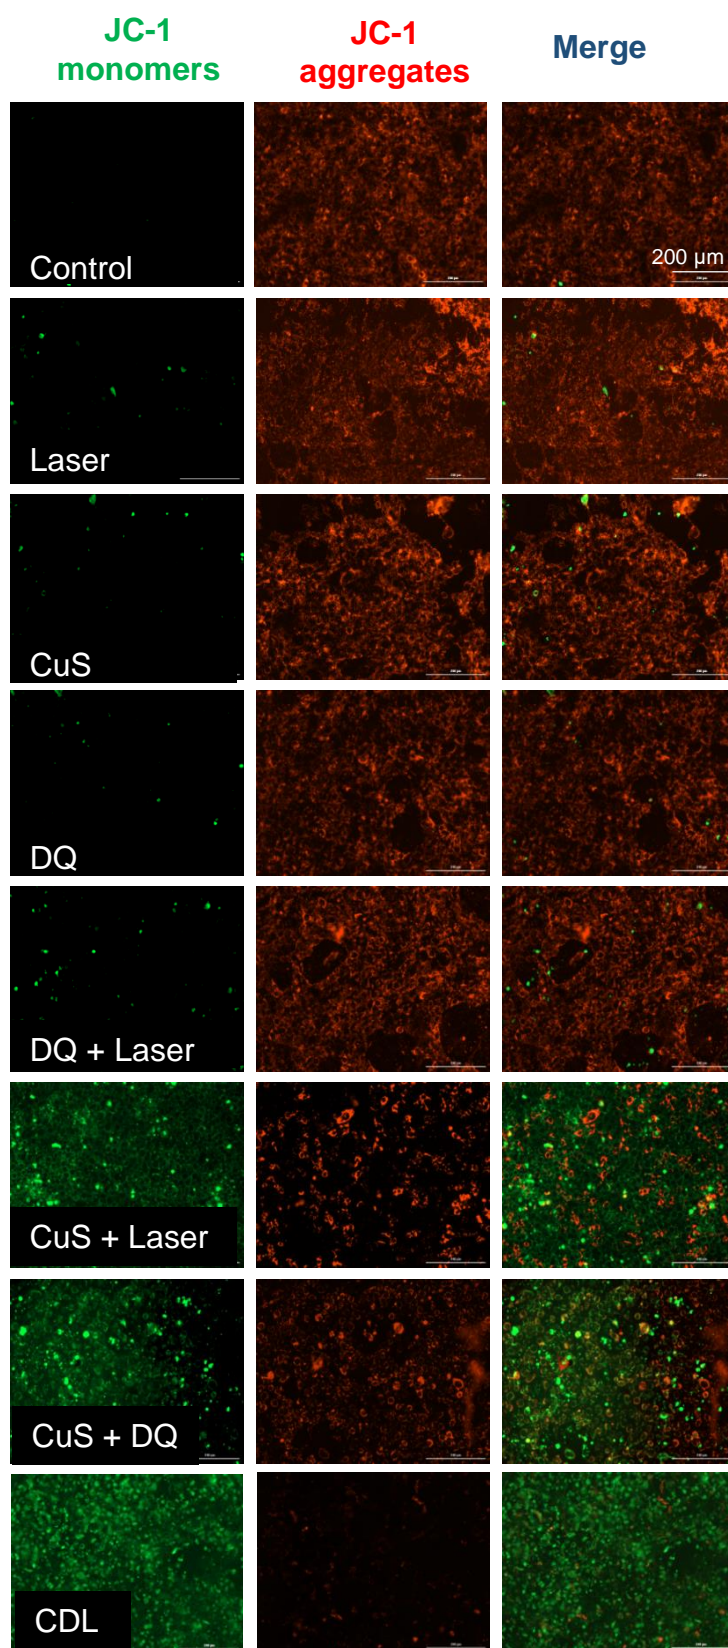

**Figure S8.** The MMP of 4T1 cells receiving different treatments were determined with the JC-1 staining. (CuS, 0.1 mM; DQ, 2  $\mu$ M; Laser, 2.54 W/cm<sup>2</sup> for 5 minutes.)
